# Supplementary material for: Alterations of protein expression of phospholamban, ZASP and plakoglobin in human atria in subgroups of seniors
Source: PubMed Central journal article supplement (PMC6449388; doi:10.1038/s41598-019-42141-w), 2019-04-04
Supplement: 41598_2019_42141_MOESM1_ESM.pdf [file 41598_2019_42141_MOESM1_ESM.pdf]

## **Alterations of protein expression of phospholamban, ZASP and plakoglobin in human atria in subgroups of seniors.**

Ulrich Gergs<sup>a\*</sup>, Winnie Mangold<sup>a</sup>, Frank Langguth<sup>a</sup>, Mechthild Hatzfeld<sup>b</sup>, Steffen Hauptmann<sup>c</sup>, Hasan Bushnaq<sup>d</sup>, Andreas Simm<sup>d</sup>, Rolf-Edgar Silber<sup>d</sup>, Joachim Neumann<sup>a</sup>

<sup>a</sup>Institut für Pharmakologie und Toxikologie, Medizinische Fakultät, Martin-Luther-Universität Halle-Wittenberg, 06097 Halle (Saale), Germany

<sup>b</sup>Institut für Pathophysiologie, Medizinische Fakultät, Martin-Luther-Universität Halle-Wittenberg, 06097 Halle (Saale), Germany

<sup>c</sup>Institut für Pathology, Medizinische Fakultät, Martin-Luther-Universität Halle-Wittenberg, 06097 Halle (Saale), Germany

<sup>d</sup>Klinik für Herz- und Thoraxchirurgie, Medizinische Fakultät, Martin-Luther-Universität Halle-Wittenberg, 06097 Halle, Germany

Short title: Protein expression in human atria

\*Corresponding author: Ulrich Gergs, Institut für Pharmakologie und Toxikologie, Medizinische Fakultät, Martin-Luther-Universität Halle-Wittenberg, Magdeburger Str. 4, 06112 Halle (Saale), Germany

Tel.: +49-345-557 4093, Fax: +49-345-557 1835, E-mail: [ulrich.gergs@medizin.uni-halle.de](mailto:ulrich.gergs@medizin.uni-halle.de)

## Supplementary Figures

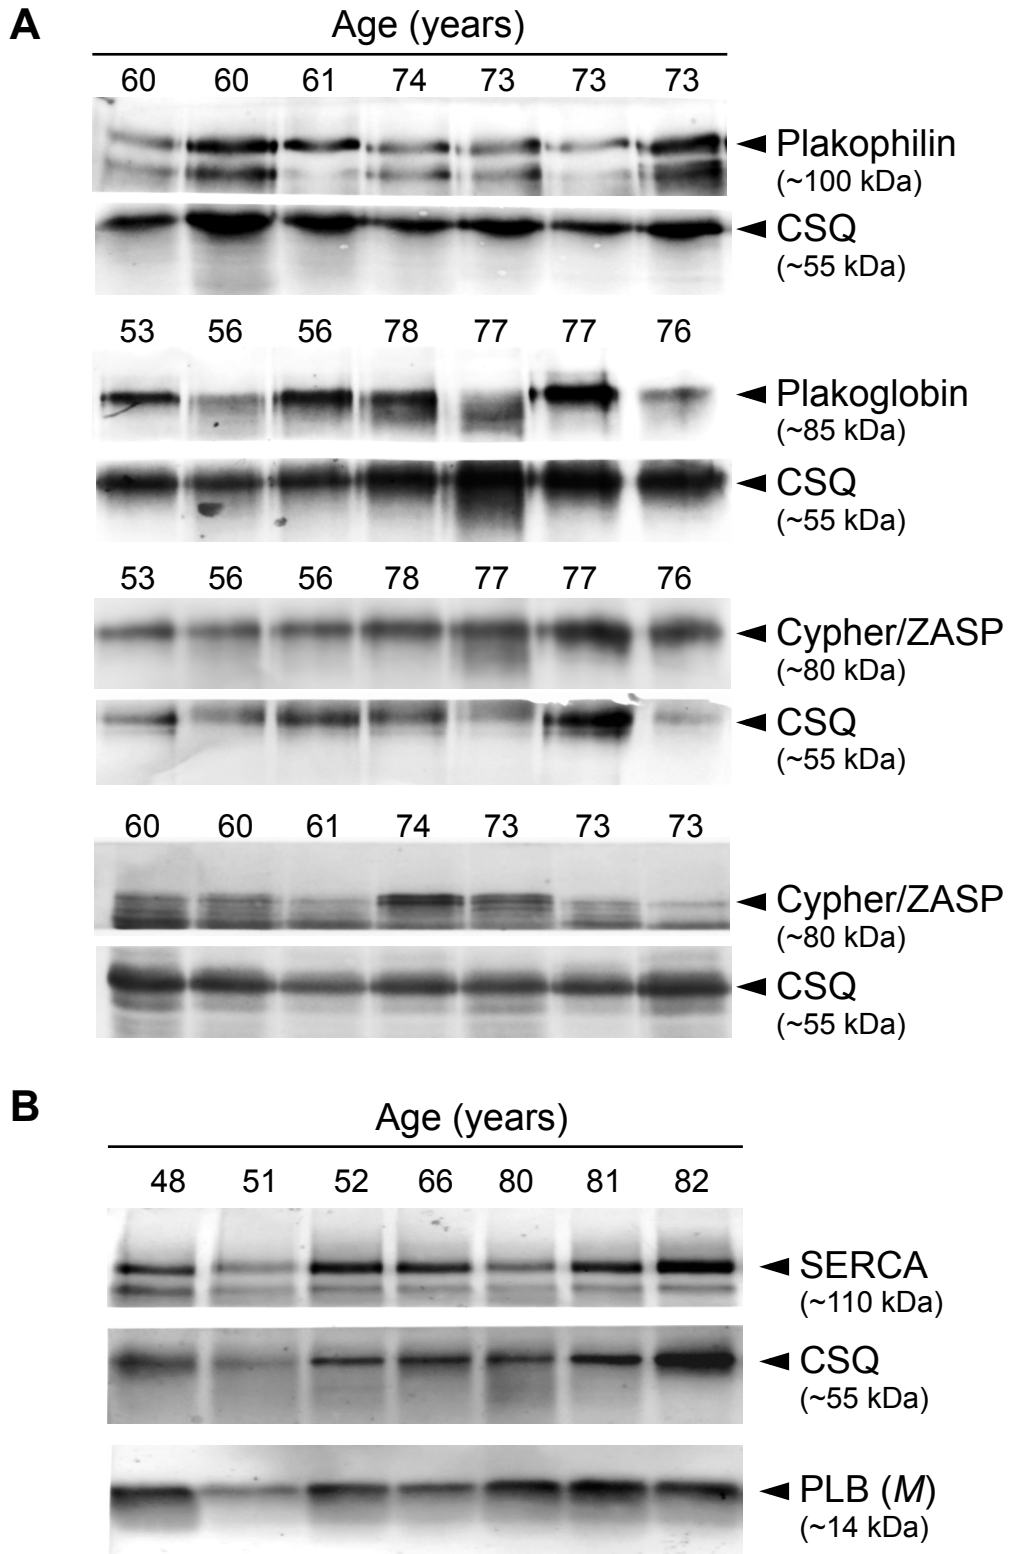

**Figure S1.** Examples of original Western blotting experiments. Expression of (A) plakophilin, plakoglobin, and the Z-band protein cypher 1 (Cypher/ZASP) and of (B) sarcoplasmic reticulum  $\text{Ca}^{2+}$ -ATPase (SERCA) and phospholamban (PLB) in human right atrium from patients of different age as indicated. Calsequestrin 2 (CSQ) expression was used as loading control. The corresponding CSQ blots are shown. These examples demonstrate the scattering of the Western blot experiments as discussed in the section “study limitations”.

# Supplementary Figures

**A**

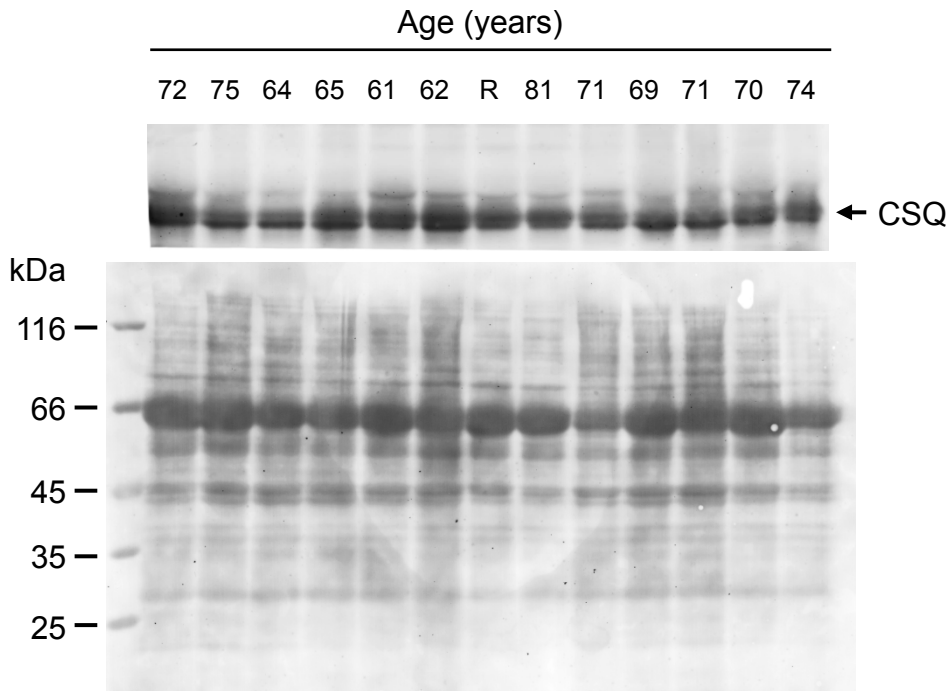

**B**

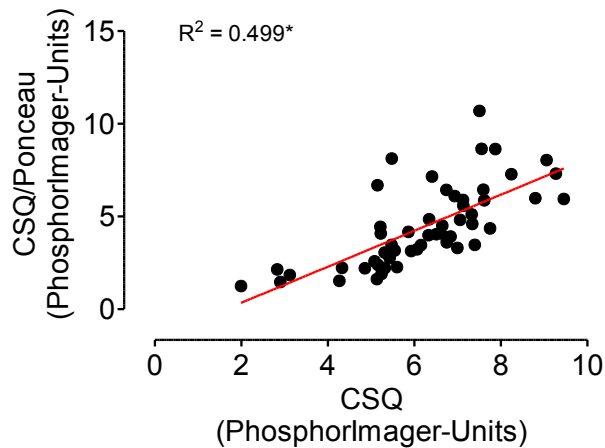

**C**

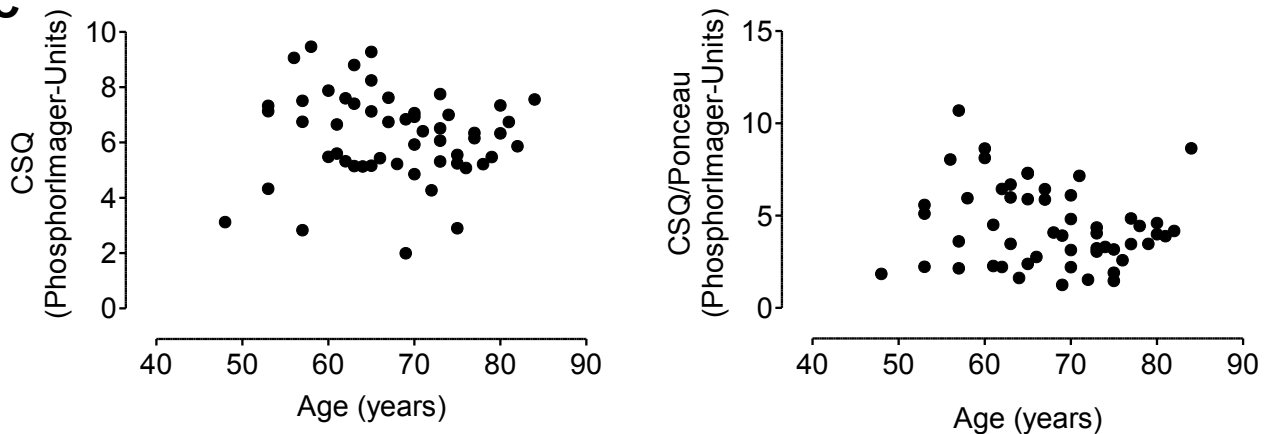

**Figure S2.** Expression of cardiac calsequestrin 2 (CSQ) in human right atrium. **(A)** One representative Western blot experiment for CSQ and the corresponding Ponceau S staining of the membrane. **(B)** Correlation of CSQ with CSQ normalized to Ponceau S staining. **(C)** Correlation of CSQ and normalized CSQ with age demonstrating no age-dependent CSQ expression in human right atrium. \* indicates a significant correlation ( $p < 0.05$ ).  $N(\text{total}) = 53$ .

## Supplementary Figures

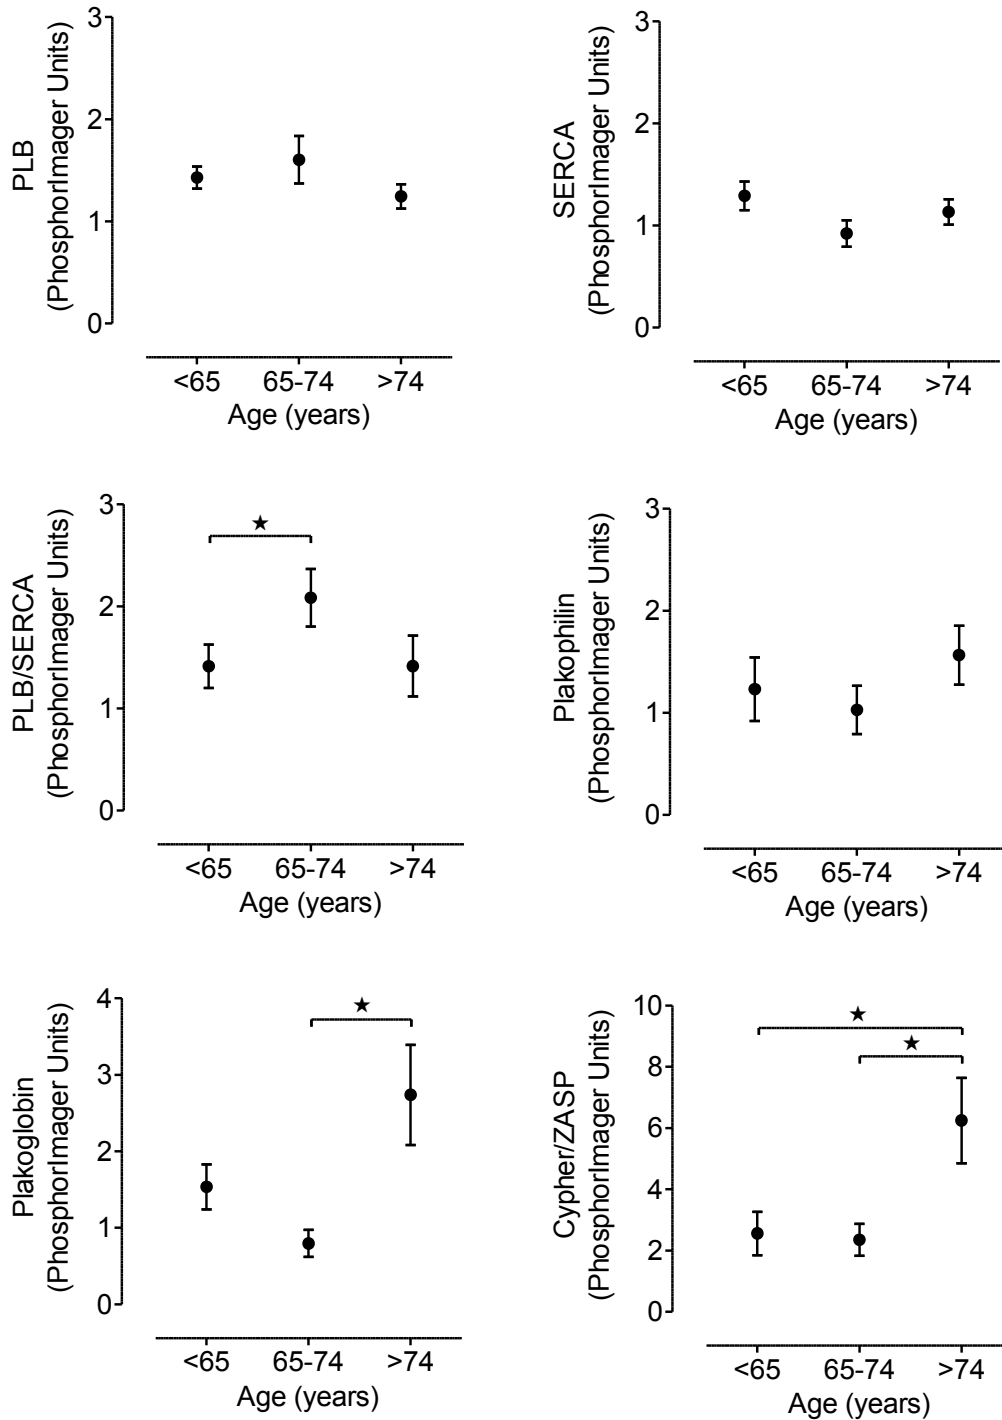

**Figure S3.** Expression of phospholamban (PLB), sarcoplasmic reticulum  $\text{Ca}^{2+}$ -ATPase (SERCA), the ratio of PLB and SERCA (PLB/SERCA), plakophilin, plakoglobin, and the Z-band protein cypher 1 (Cypher/ZASP) in human right atrium. Protein expression data  $\pm$  SEM are categorized into three commonly used intervals. Ordinates are protein expression, normalized to cardiac calsequestrin in arbitrary PhosphorImager units versus age (abscissae). \*indicates a significant difference ( $p < 0.05$ ) between age groups calculated by ANOVA followed by Bonferroni's multiple comparison test.  $N(\text{total}) = 53$ ,  $N(<65) = 20$ ,  $N(65-74) = 19$ ,  $N(>74) = 14$ .

## Supplementary Tables

Table S1: Characteristics of patients included in the study.

| Age (years) | NYHA     | EF (%) | CCS | Statins | ASS | ACE inhibitor | AT1 receptor antagonist | β-Blocker  |
|-------------|----------|--------|-----|---------|-----|---------------|-------------------------|------------|
| 48          | II - III | 55     | 2   | 1       | 1   | 1             | 0                       | Metoprolol |
| 51          | II - III | 65     | 2   | 1       | 1   | 1             | 0                       | Bisoprolol |
| 52          | II       | 60     | 2   | 0       | 0   | 0             | 0                       | Metoprolol |
| 53          | II       | 57     | 2   | 1       | 0   | 1             | 0                       | Metoprolol |
| 53          | II       | 52     | 2   | 1       | 1   | 1             | 0                       | Metoprolol |
| 53          | II       | 72     | 2   | 0       | 1   | 0             | 1                       | Metoprolol |
| 56          | II       | 65     | 1-2 | 1       | 1   | 1             | 0                       | Metoprolol |
| 56          | II       | 58     | 3   | 1       | 1   | 1             | 0                       | Metoprolol |
| 57          | II       | 76     | 3   | 1       | 0   | 1             | 0                       | Metoprolol |
| 57          | II       | 50     | 3   | 1       | 1   | 1             | 0                       | Bisoprolol |
| 57          | II       | 67     | 2   | 0       | 1   | 0             | 0                       | Bisoprolol |
| 58          | III      | 63     | 2   | 1       | 0   | 0             | 0                       | Metoprolol |
| 60          | II       | 60     | 2   | 1       | 1   | 1             | 0                       | Metoprolol |
| 60          | II       | 80     | 2   | 1       | 1   | 1             | 0                       | Bisoprolol |
| 60          | I        | 78     | 2-3 | 0       | 1   | 1             | 0                       | Bisoprolol |
| 61          | II       | 63     | 2   | 0       | 1   | 1             | 0                       | Metoprolol |
| 62          | III      | 40     | 2   | 1       | 0   | 1             | 0                       | Metoprolol |
| 63          | II       | 60     | 2   | 1       | 1   | 0             | 0                       | Metoprolol |
| 63          | II       | 70     | 2   | 1       | 1   | 1             | 0                       | Metoprolol |
| 63          | II       | 89     | 2   | 1       | 0   | 0             | 1                       | Metoprolol |
| 65          | II - III | 55     | 2-3 | 1       | 1   | 1             | 0                       | Metoprolol |
| 65          | II       | 55     | 2   | 1       | 0   | 0             | 0                       | Metoprolol |
| 65          | II       | 71     | 3   | 0       | 1   | 1             | 0                       | Metoprolol |
| 66          | II       | 61     | 4   | 1       | 0   | 0             | 0                       | Bisoprolol |
| 67          | II       | 58     | 2   | 1       | 1   | 1             | 0                       | Bisoprolol |
| 67          | II       | 78     | 2   | 0       | 1   | 0             | 0                       | Metoprolol |
| 68          | II       | 35     | 2   | 0       | 1   | 1             | 0                       | Metoprolol |
| 69          | II       | 71     | 2   | 0       | 1   | 1             | 0                       | Carvedilol |
| 69          | II       | 72     | 2   | 1       | 1   | 0             | 0                       | Bisoprolol |
| 70          | II       | 75     | 2   | 1       | 1   | 1             | 0                       | Metoprolol |
| 70          | III      | 58     | 2   | 1       | 1   | 1             | 0                       | Metoprolol |
| 70          | II       | 65     | 3   | 1       | 1   | 0             | 0                       | Bisoprolol |
| 70          | II       | 74     | 2   | 1       | 1   | 1             | 0                       | Metoprolol |
| 71          | II       | 66     | 2-3 | 0       | 0   | 0             | 1                       | Metoprolol |
| 73          | II       | 62     | 2   | 1       | 0   | 0             | 0                       | Carvedilol |
| 73          | II       | 60     | 2   | 1       | 0   | 1             | 0                       | Metoprolol |
| 73          | II       | 46     | 2   | 1       | 0   | 0             | 0                       | Metoprolol |
| 73          | II       | 73     | 2   | 1       | 1   | 1             | 0                       | Metoprolol |
| 74          | II - III | 35     | 2-3 | 1       | 1   | 1             | 0                       | Metoprolol |
| 75          | II       | 49     | 2   | 1       | 1   | 1             | 0                       | Metoprolol |
| 75          | II       | 44     | 2   | 1       | 1   | 0             | 1                       | Carvedilol |
| 75          | II       | 75     | 2-3 | 1       | 1   | 1             | 0                       | Metoprolol |
| 76          | I        | 74     | 2   | 0       | 0   | 1             | 0                       | Bisoprolol |
| 76          | II       | 70     | 2   | 1       | 1   | 1             | 0                       | Bisoprolol |
| 77          | III      | 50     | 2   | 1       | 1   | 1             | 0                       | Metoprolol |
| 77          | II       | 65     | 4   | 0       | 0   | 1             | 0                       | Metoprolol |
| 78          | II       | 55     | 2   | 1       | 1   | 1             | 0                       | Metoprolol |
| 79          | II       | 62     | 3   | 1       | 1   | 1             | 0                       | Carvedilol |
| 80          | I        | 71     | 1   | 1       | 0   | 1             | 0                       | Metoprolol |
| 80          | II       | 70     | 3   | 0       | 1   | 1             | 0                       | Bisoprolol |
| 81          | II       | 60     | 2   | 1       | 1   | 0             | 0                       | Bisoprolol |
| 82          | II       | 56     | 2   | 0       | 1   | 1             | 0                       | Metoprolol |
| 84          | I        | 60     | 4   | 1       | 1   | 1             | 0                       | Metoprolol |

NYHA, New York Heart Association classification of heart failure

EF, left ventricular ejection fraction in %

CCS, Canadian Cardiovascular Society angina class

ASS, acetylsalicylic acid

ACE, angiotensin-converting enzyme

AT1 receptor, angiotensin II receptor type 1

In the columns for medications, "1" means yes and "0" means no.
